# Supplementary material for: A survey of pediatricians' attitudes regarding influenza immunization in children
Source: PubMed Central journal article supplement (PMC2645391; doi:10.1186/1471-2431-9-8), 2009-01-30
Supplement: 1471-2431-9-8-S1.pdf [file 1471-2431-9-8-S1.pdf]

**AMERICAN ACADEMY OF PEDIATRICS—MARYLAND CHAPTER***Questionnaire to Determine Attitudes and Practices Regarding Immunizing Children Against Influenza*

1. Is your practice?:    \_\_\_ urban    \_\_\_suburban    \_\_\_rural
2. Approximately how many patients does your practice serve?    \_\_\_\_\_
3. Estimate the percent of patients in the following at-risk categories you immunize with flu vaccine who are:
- a. Children aged 6-23 months    \_\_\_\_\_
  - b. Children aged 24-59 months    \_\_\_\_\_
  - c. Children at high-risk    \_\_\_\_\_
  - d. Children who are household contacts of high-risk individuals    \_\_\_\_\_
- 3a. Do you have a callback system for flu immunization?    Yes \_\_\_\_\_    No \_\_\_\_\_
4. Do you immunize patients during:
- a. Regular visits    Yes \_\_\_\_\_    No \_\_\_\_\_
  - b. Special influenza immunization clinics    Yes \_\_\_\_\_    No \_\_\_\_\_
  - c. Sick visits    Yes \_\_\_\_\_    No \_\_\_\_\_
- [Respondents can select more than one category]
5. What percent of children in your practice are VFC eligible?    \_\_\_\_\_
6. Is influenza immunization profitable for your practice?
- a. Significantly profitable    \_\_\_\_\_
  - b. Minimally profitable    \_\_\_\_\_
  - c. Cost neutral    \_\_\_\_\_
  - d. Produces a loss    \_\_\_\_\_

7. What would improve profitability? \_\_\_\_\_
8. Would you be supportive of a school-based immunization program? Yes\_\_\_ No\_\_\_
9. Would you participate in a school immunization program? Yes\_\_\_ No\_\_\_
10. What, if anything, would persuade you to participate?
- a. Financial remuneration \_\_\_\_\_
  - b. Civic involvement \_\_\_\_\_
  - c. Source of new patients \_\_\_\_\_
  - d. Nothing \_\_\_\_\_
11. How might you participate?
- a. On-site supervision \_\_\_\_\_
  - b. Off-site supervision \_\_\_\_\_
12. What percentage of the following vaccines do you use in your practice?
- a. Thimerosal-free injectable inactivated \_\_\_\_\_
  - b. Thimerosal-containing multiple dose injectable inactivated \_\_\_\_\_
  - c. Nasal spray live attenuated \_\_\_\_\_
13. FluMist is presently being considered by the FDA for supplemental licensure for children 1-5 years of age without a history of wheezing or asthma. You are already asking a number of questions before giving any influenza vaccine to children (e.g., history of egg allergy or Guillan-Barre Syndrome). How much more burdensome would it be to ask the following additional question? (1 = not at all; 5 = very)
- Has the parent or healthcare provider ever noted wheezing or asthma in this child?
- 1\_\_\_ 2\_\_\_ 3\_\_\_ 4\_\_\_ 5\_\_\_
